# Supplementary material for: Replicative senescent human cells possess altered circadian clocks with a prolonged period and delayed peak-time
Source: publisher site journal article supplement (doi:10.18632/aging.101794), 2019-02-09
Supplement: Supplementary file [file aging-v11i3-101794-supplementary-material-SD1.pdf]

SUPPLEMENTARY MATERIAL

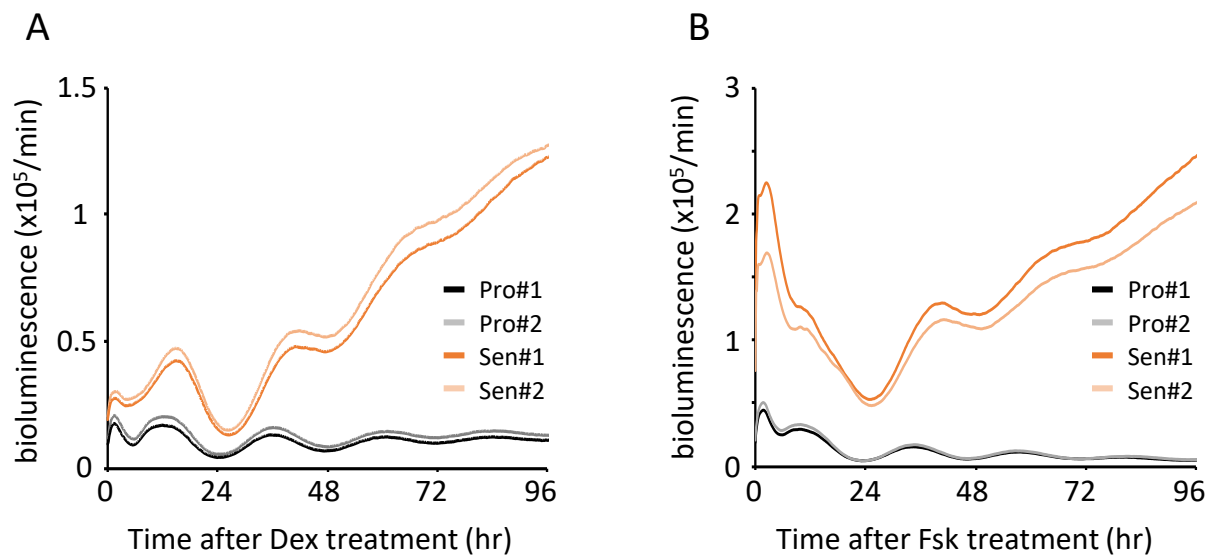

**Figure S1. Oscillation patterns of luciferase in the proliferative and senescent cells.** Raw data of Fig.2A (A) and 6A (B) are shown. Black and orange lines depict the results in proliferative and senescent cells, respectively.

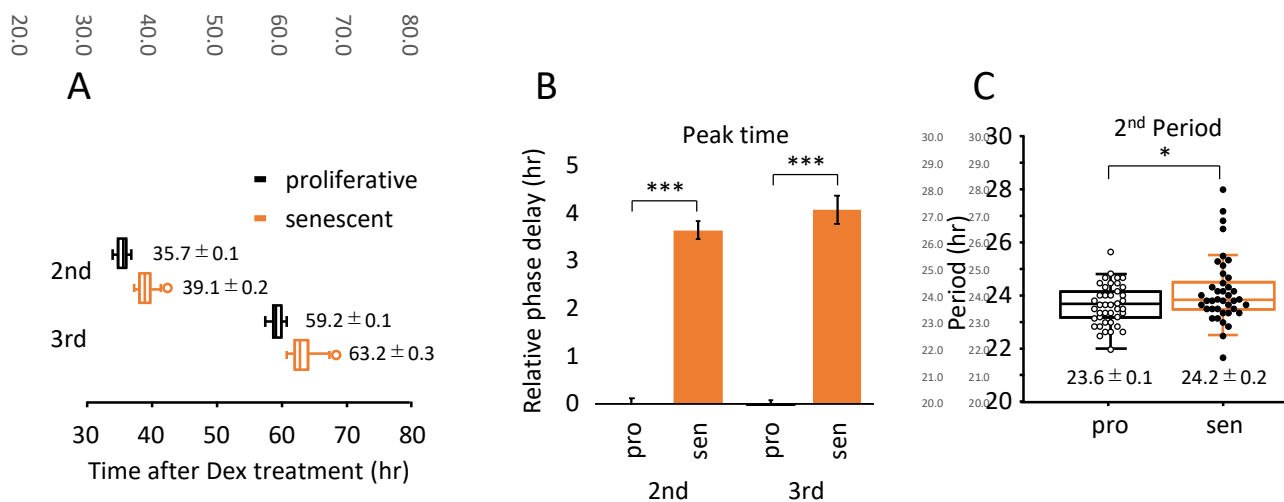

**Figure S2. Alteration of circadian clock in the senescent cells was observed by a “Dex”-induced entrainment.**

(A) Box-whisker plots of peak-times are displayed, n=41. Values are mean  $\pm$  SEM. (B) Relative peak-time differences were measured, n=41. (C) Box-whisker plots of period lengths in the proliferative (pro) and senescent (sen) cells are displayed, n=41. Values are mean  $\pm$  SEM. \*p<0.05, \*\*\*p<0.001, compared to each of the proliferative cells by Student’s two-tailed t test, n=41.

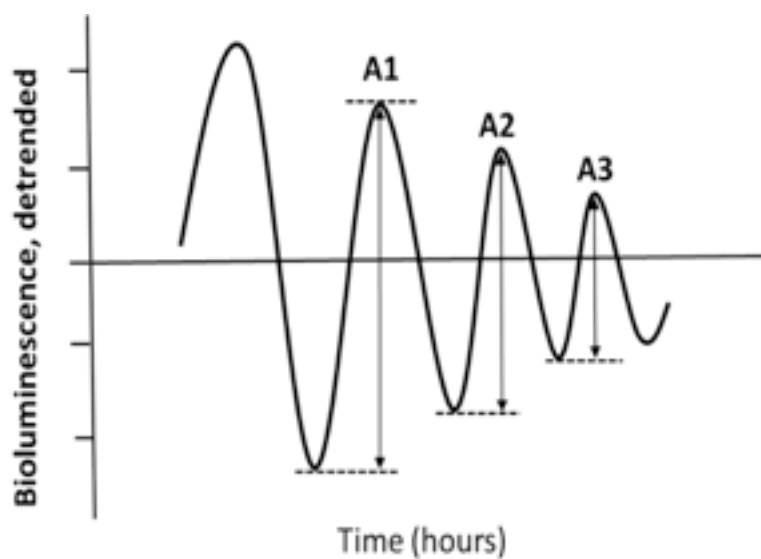

**Figure S3. Scheme of how damping ratio are measured in this study.** A1, A2, and A3, between top to nadir of each oscillation, were determined. Range of the 1<sup>st</sup> oscillation (A1) was set to 1 and the damping ratios of A2 and A3 were calculated.

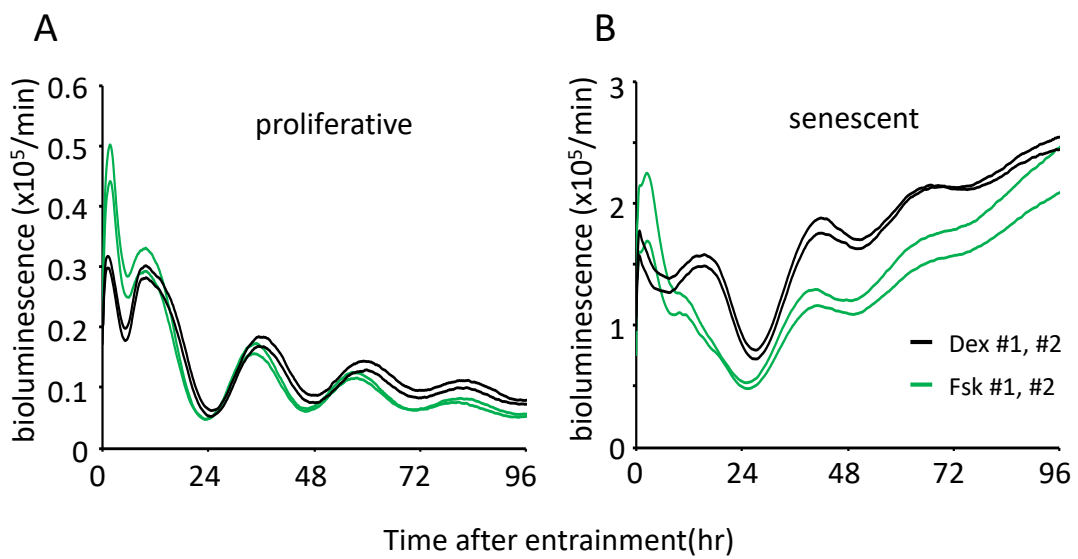

**Figure S4. Oscillation patterns of luciferase in the proliferative and senescent cells.** Raw data of Fig.3A (A) and B (B) are shown. Black and green lines depict the results of Dex- and Fsk-treated cells, respectively.

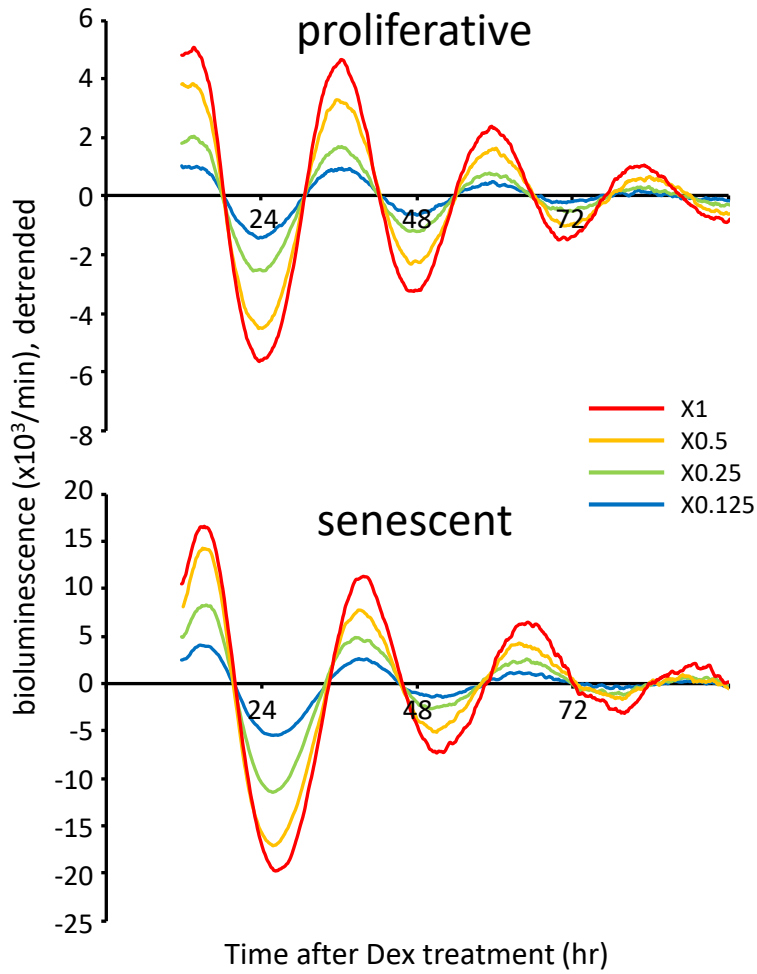

**Figure S5. Effects of virus dosage on circadian clocks in the proliferative and the senescent cells.** Oscillation patterns of luciferase in serially diluted virus-infected TIG-3 cells are shown. Two independent experiments were performed.

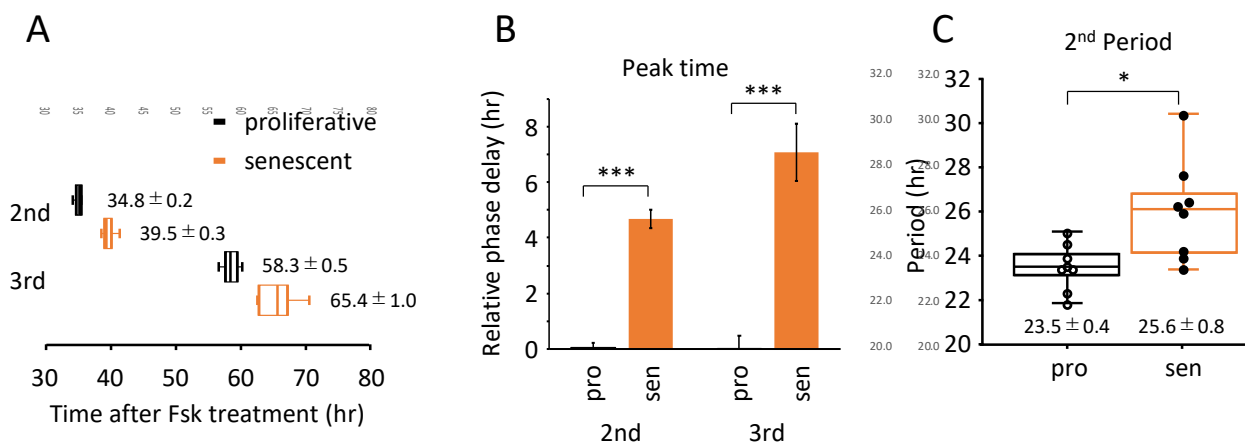

**Figure S6. Alteration of circadian clock in the senescent cells was observed by a “Fsk”-induced entrainment. (A)** Box-whisker plots of peak-times are displayed, n=8. Values are mean  $\pm$  SEM. **(B)** Relative peak-time differences were measured, n=8. **(C)** Box-whisker plots of period lengths in the proliferative (pro) and senescent (sen) cells are displayed, n=8. Values are mean  $\pm$  SEM. \*p<0.05, \*\*\*p<0.001, compared to each of the proliferative cells by Student’s two-tailed *t* test, n=8.

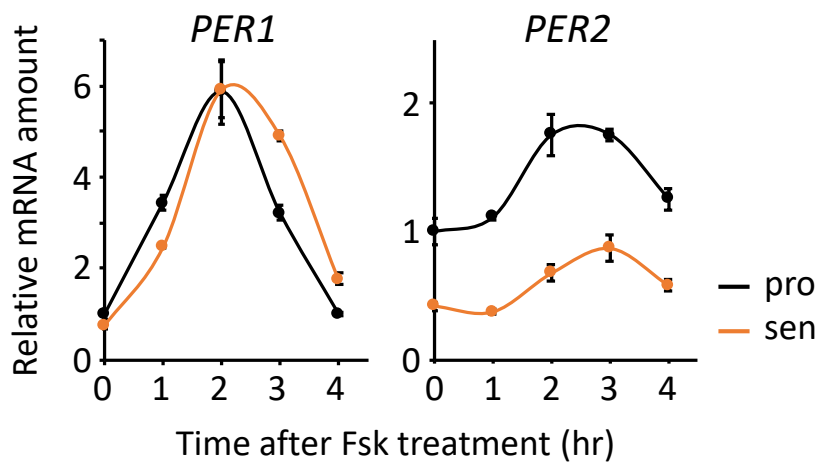

**Figure S7. Acute responses of clock genes were quantified.** Acute responses of *PER1* and *PER2* induced by Fsk were quantified by qPCR. Each sample was normalized by 18S rRNA. Time 0 of proliferative cells were set to 1 for each gene.

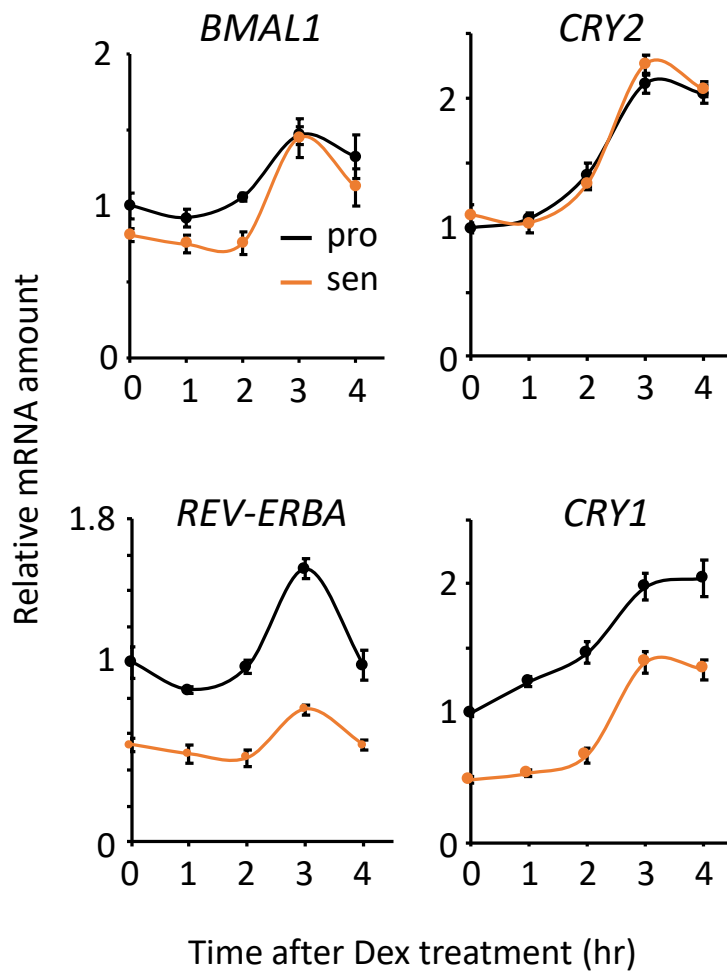

**Figure S8. Acute responses of clock genes were quantified.** Acute responses of *CRY2*, *REV-REBA* and *CRY1* induced by Dex were quantified by qPCR. Each sample was normalized by 18S rRNA. Time 0 of proliferative cells were set to 1 for each gene.



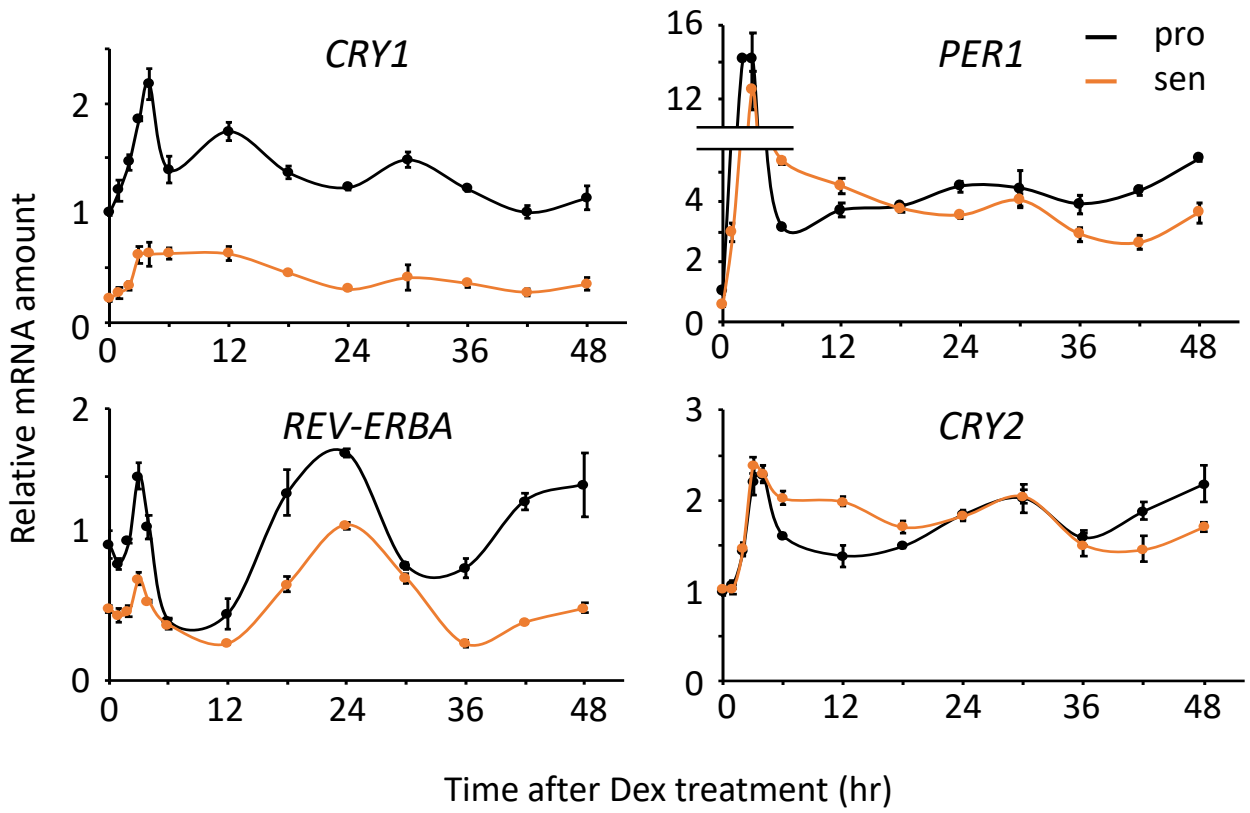

**Figure S9. Circadian expression profiles of endogenous circadian genes were quantified.** Circadian expression profiles of *CRY1*, *REV-ERBA*, *PER1* and *CRY2* were quantified by qPCR. Each sample was normalized by 18S rRNA. Time 0 of proliferative cells were set to 1 for each gene.
